# Supplementary material for: Mental health services and resources for children with developmental disabilities and their families: scan of local practices, gaps, and opportunities created
Source: PubMed Central journal article supplement (PMC10267822; doi:10.3389/fresc.2023.1118769), 2023-05-30
Supplement: Datasheet1.pdf [file Datasheet1.pdf]

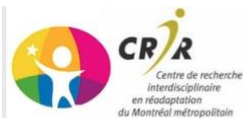

**Nature of Service/Resource (Select one or more that apply):**

- In-person     Telehealth     Web-based informational

**Section 1:**

|                                                                         |  |
|-------------------------------------------------------------------------|--|
| <b><i>What is general information about the services/resources?</i></b> |  |
| Name of service/resource                                                |  |
| Name of director and/or clinical coordinator                            |  |
| Title (Dr., etc.)                                                       |  |
| Phone number                                                            |  |
| Email Address                                                           |  |
| Location                                                                |  |
| Website                                                                 |  |

**Section 2:**

| <b><i>What is the services/resources method of initial access?</i></b> | <b><i>Select one or more that apply</i></b> | <b><i>Comments</i></b> |
|------------------------------------------------------------------------|---------------------------------------------|------------------------|
| Are appointments reserved over the phone?                              | <input type="checkbox"/>                    |                        |
| Are appointments reserved over email?                                  | <input type="checkbox"/>                    |                        |



|                                                                                                     |                          |  |
|-----------------------------------------------------------------------------------------------------|--------------------------|--|
| Are appointments reserved on an online booking portal?                                              | <input type="checkbox"/> |  |
| Are services care by transfer (e.g., direct transfer from healthcare service to mental healthcare)? | <input type="checkbox"/> |  |
| Was there no method necessary (e.g., web-based informational)?                                      | <input type="checkbox"/> |  |

**Section 3:**

| <b><i>What are the admission/participation criteria for the service/resource?</i></b> | <b><i>Select one or more that apply</i></b> | <b><i>Comments</i></b> |
|---------------------------------------------------------------------------------------|---------------------------------------------|------------------------|
| Specific Disability, <i>If yes, specify what disability</i>                           | <input type="checkbox"/>                    |                        |
| Age of the child (Years)                                                              | <input type="checkbox"/>                    |                        |
| Cost                                                                                  | <input type="checkbox"/>                    |                        |
| Language (e.g., only in English or French), <i>If yes, specify what language</i>      | <input type="checkbox"/>                    |                        |
| Referral                                                                              | <input type="checkbox"/>                    |                        |
| Wait-list                                                                             | <input type="checkbox"/>                    |                        |
| Geo-location                                                                          | <input type="checkbox"/>                    |                        |

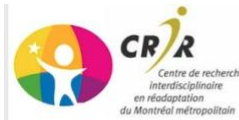

**Section 4:**

| <i>Who does the service/resource target? (Does the program address the needs of the child, the parent, or both? If both specify details for each group and if there are any differences).</i> | <i>Select one or more that apply</i> | <i>Comments</i> |
|-----------------------------------------------------------------------------------------------------------------------------------------------------------------------------------------------|--------------------------------------|-----------------|
| Child                                                                                                                                                                                         | <input type="checkbox"/>             |                 |
| Parent                                                                                                                                                                                        | <input type="checkbox"/>             |                 |
| Both (Family)                                                                                                                                                                                 | <input type="checkbox"/>             |                 |

**Section 5:**

| <i>What is the goal/focus of the service/resource?</i> | <i>Select one or more that apply</i> | <i>Comments</i> |
|--------------------------------------------------------|--------------------------------------|-----------------|
| Assessment                                             | <input type="checkbox"/>             |                 |
| Intervention                                           | <input type="checkbox"/>             |                 |
| Follow-up                                              | <input type="checkbox"/>             |                 |
| Crisis/emergency management                            | <input type="checkbox"/>             |                 |
| Redirection                                            | <input type="checkbox"/>             |                 |
| Other                                                  | <input type="checkbox"/>             |                 |

**Section 6:**

**Any other pertinent information that you would like to share with us about this program:**

Empty text box for providing additional information.
